# Supplementary material for: Activation of L-lactate oxidase by the formation of enzyme assemblies through liquid–liquid phase separation
Source: PubMed Central journal article supplement (PMC9877012; doi:10.1038/s41598-023-28040-1), 2023-01-25
Supplement: 41598_2023_28040_MOESM1_ESM.pdf [file 41598_2023_28040_MOESM1_ESM.pdf]

## Supplementary Information

### **Activation of L-lactate oxidase by the formation of enzyme assemblies through liquid–liquid phase separation**

Tomoto Ura<sup>1,2</sup>, Ako Kagawa<sup>2</sup>, Nanako Sakakibara<sup>1,2</sup>, Hiromasa Yagi<sup>2</sup>, Naoya Tochio<sup>2</sup>, Takanori Kigawa<sup>2</sup>, Kentaro Shiraki<sup>1,\*</sup>, Tsutomu Mikawa<sup>2,\*</sup>

<sup>1</sup>Faculty of Pure and Applied Sciences, University of Tsukuba, 1-1-1 Tennodai, Tsukuba, Ibaraki 305-8573, Japan.

<sup>2</sup>RIKEN Center for Biosystems Dynamics Research, 1-7-22 Suehiro-cho, Tsurumi-ku, Yokohama 230-0045, Japan

\* To whom correspondence should be addressed. Tsutomu Mikawa. Tel: +81-45-633-8013; Fax: +81-45-503-9643; Email: mikawa@riken.jp

Correspondence should also be addressed to Kentaro Shiraki. Tel: +81-29-8535306; Fax: +81-29-8535215; E-mail: shiraki@bk.tsukuba.ac.jp

Supplementary Figure S1

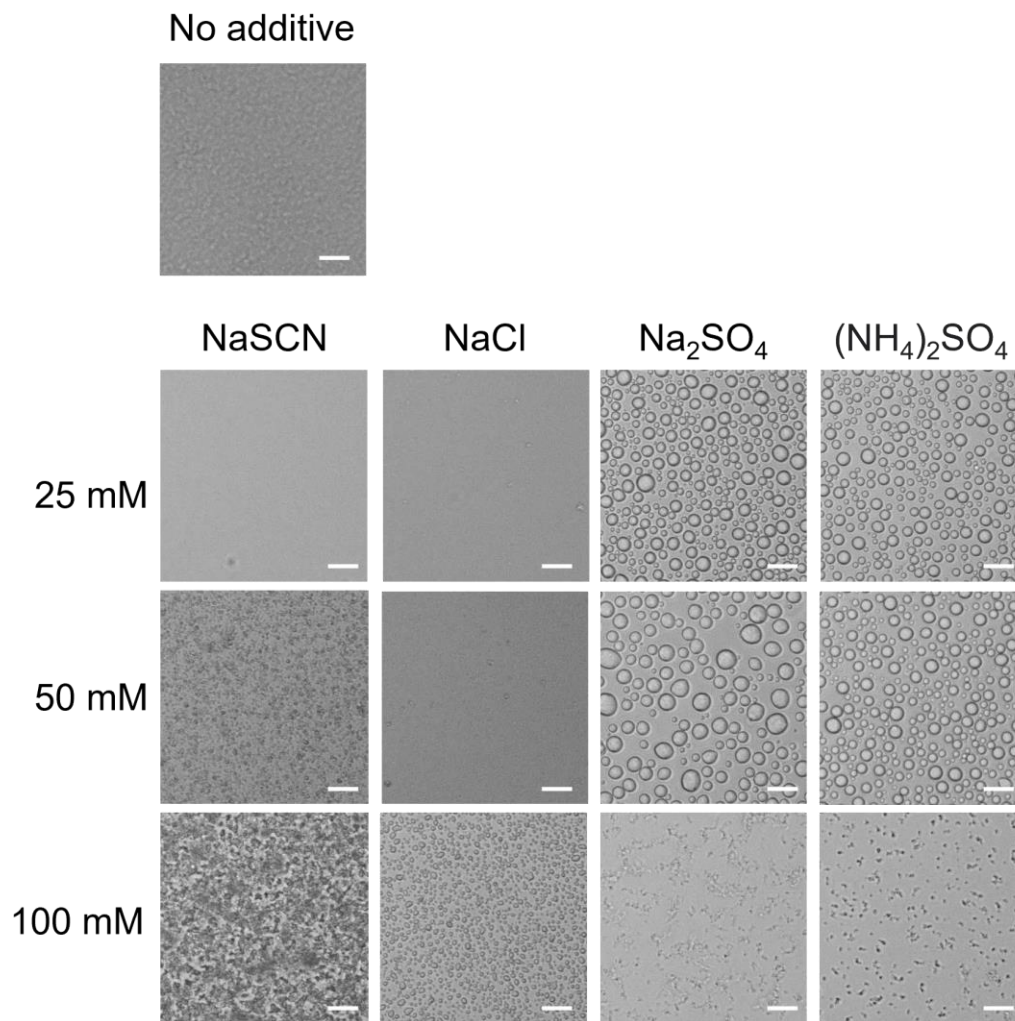

Fig. S1 Effect of the salt type and concentration on the formation of LOX-PLL assemblies. All solutions were prepared with 5  $\mu\text{M}$  LOX, 1 mM PLL (concentrations refer to lysine monomer units), and salts (sodium thiocyanate: NaSCN, sodium chloride: NaCl, sodium sulfate: Na<sub>2</sub>SO<sub>4</sub>, ammonium sulfate: ((NH<sub>4</sub>)<sub>2</sub>SO<sub>4</sub>) concentrations between 25–100 mM, and 20 mM Tris HCl (pH 8). Scale bar, 20  $\mu\text{m}$ .

Supplementary Figure S2

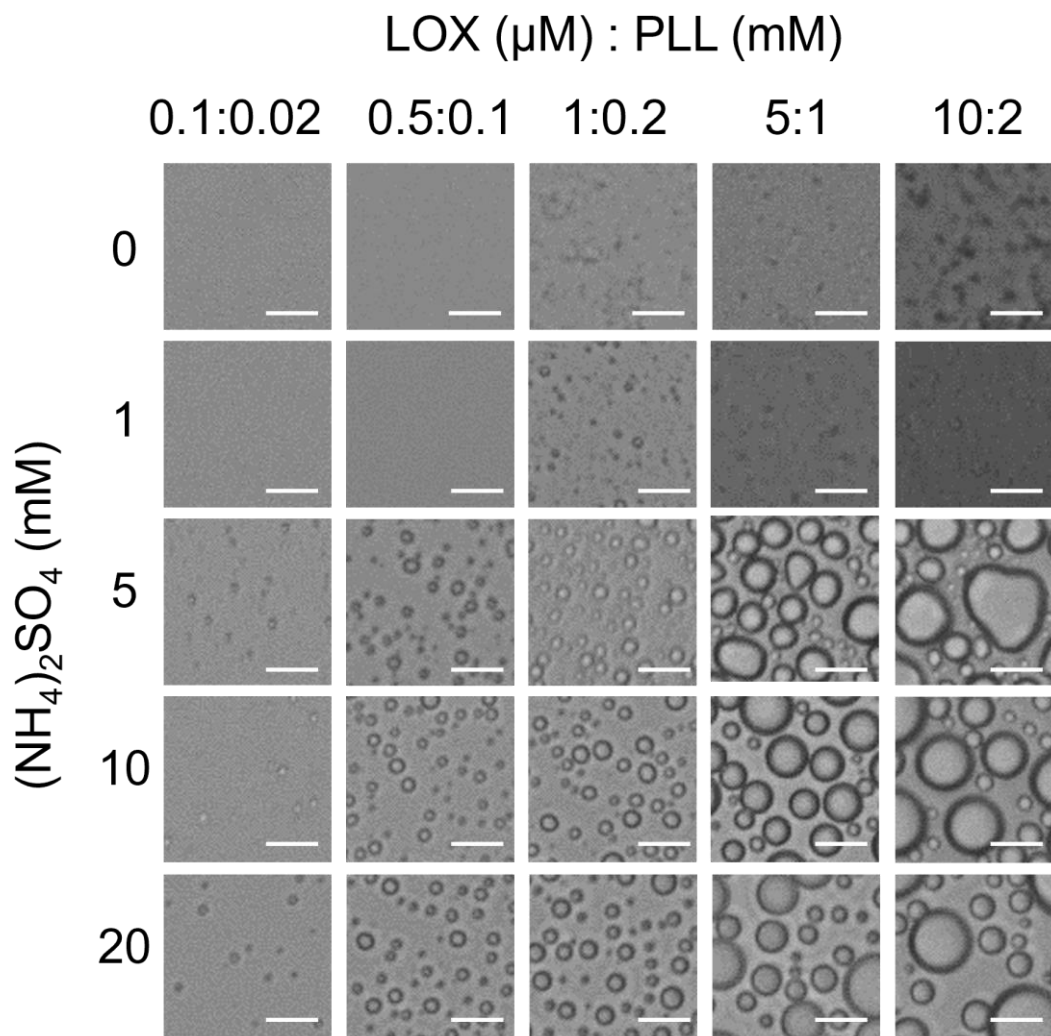

Fig. S2 Effect of ammonium sulfate on the formation of LOX-PLL assemblies. All solutions were prepared using 0.1–10  $\mu\text{M}$  LOX, 0.02–2 mM PLL, 0–20 mM ammonium sulfate, and 20 mM Tris HCl (pH 8). Scale bar, 10  $\mu\text{m}$ .

### Supplementary Figure S3

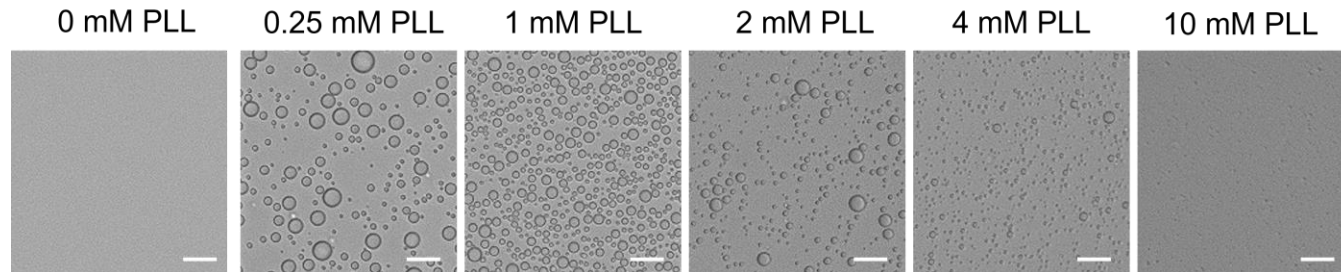

Fig. S3 Effect of PLL concentration on LOX-PLL droplet formation. All solutions were prepared with 5  $\mu\text{M}$  LOX, 0–10 mM PLL, 10 mM  $(\text{NH}_4)_2\text{SO}_4$ , and 20 mM Tris-HCl (pH 8). Scale bar, 20  $\mu\text{m}$ .

### Supplementary Figure S4

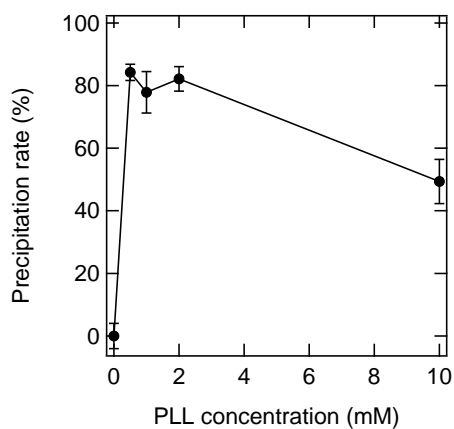

Fig. S4 Precipitation rate of LOX in the presence of PLL. All solutions were prepared with 5  $\mu\text{M}$  LOX and PLL concentrations between 0 and 10 mM, 10 mM  $(\text{NH}_4)_2\text{SO}_4$ , and 20 mM Tris-HCl (pH 8).

## Supplementary Figure S5

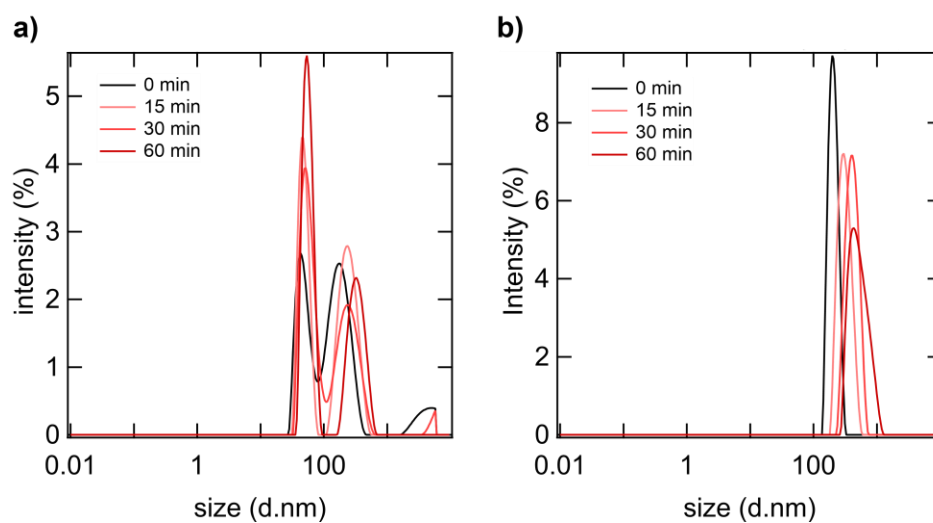

Fig. S5 Time-dependent changes in particle size of the LOX-PLL cluster **(a)** and droplet **(b)**. All solutions contained 0.1  $\mu\text{M}$  LOX, 0.02 mM PLL, 0 or 10 mM  $(\text{NH}_4)_2\text{SO}_4$ , and 20 mM Tris HCl (pH 8.0).

Supplementary Figure S6

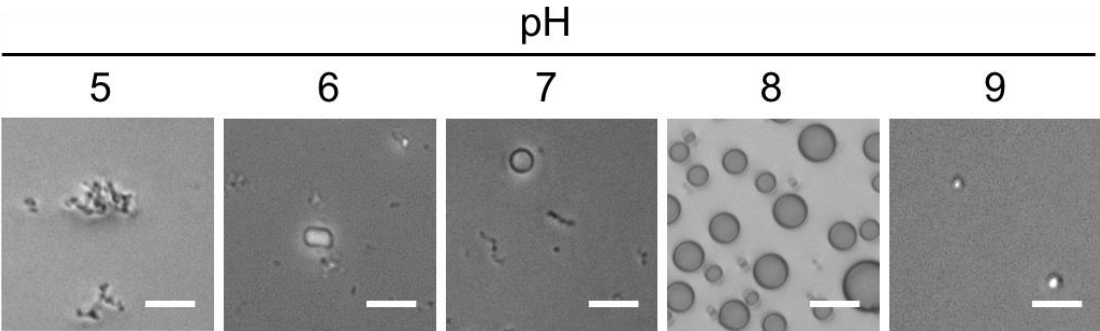

Fig. S6 Effect of PLL concentration on LOX-PLL droplet formation. All solutions were prepared with 5  $\mu$ M LOX, 0–10 mM PLL, 10 mM  $(\text{NH}_4)_2\text{SO}_4$ , 20 mM MES, and 20 mM Tris-HCl (pH 5-9). Scale bar, 20  $\mu$ m.

Supplementary Figure S7

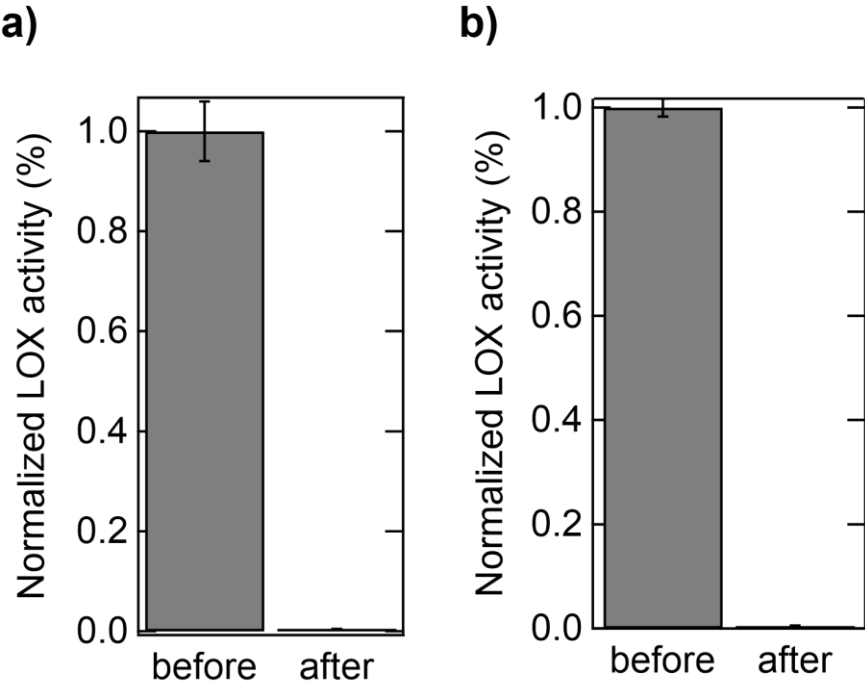

Fig. S7 Enzyme activity of LOX before and after centrifugation. **a)** Enzyme activities before and after the centrifugation of samples containing 0.1, 0.02 mM PLL, and 20 mM Tris HCl (pH 8) at  $18,800 \times g$  for 20 min. **b)** Enzyme activities before and after centrifugation of samples containing 0.1  $\mu$ M LOX, 0.02 mM PLL, 10 mM  $(\text{NH}_4)_2\text{SO}_4$ , and 20 mM Tris HCl (pH 8) at 18,800 g for 20 min.

## Supplementary Figure S8

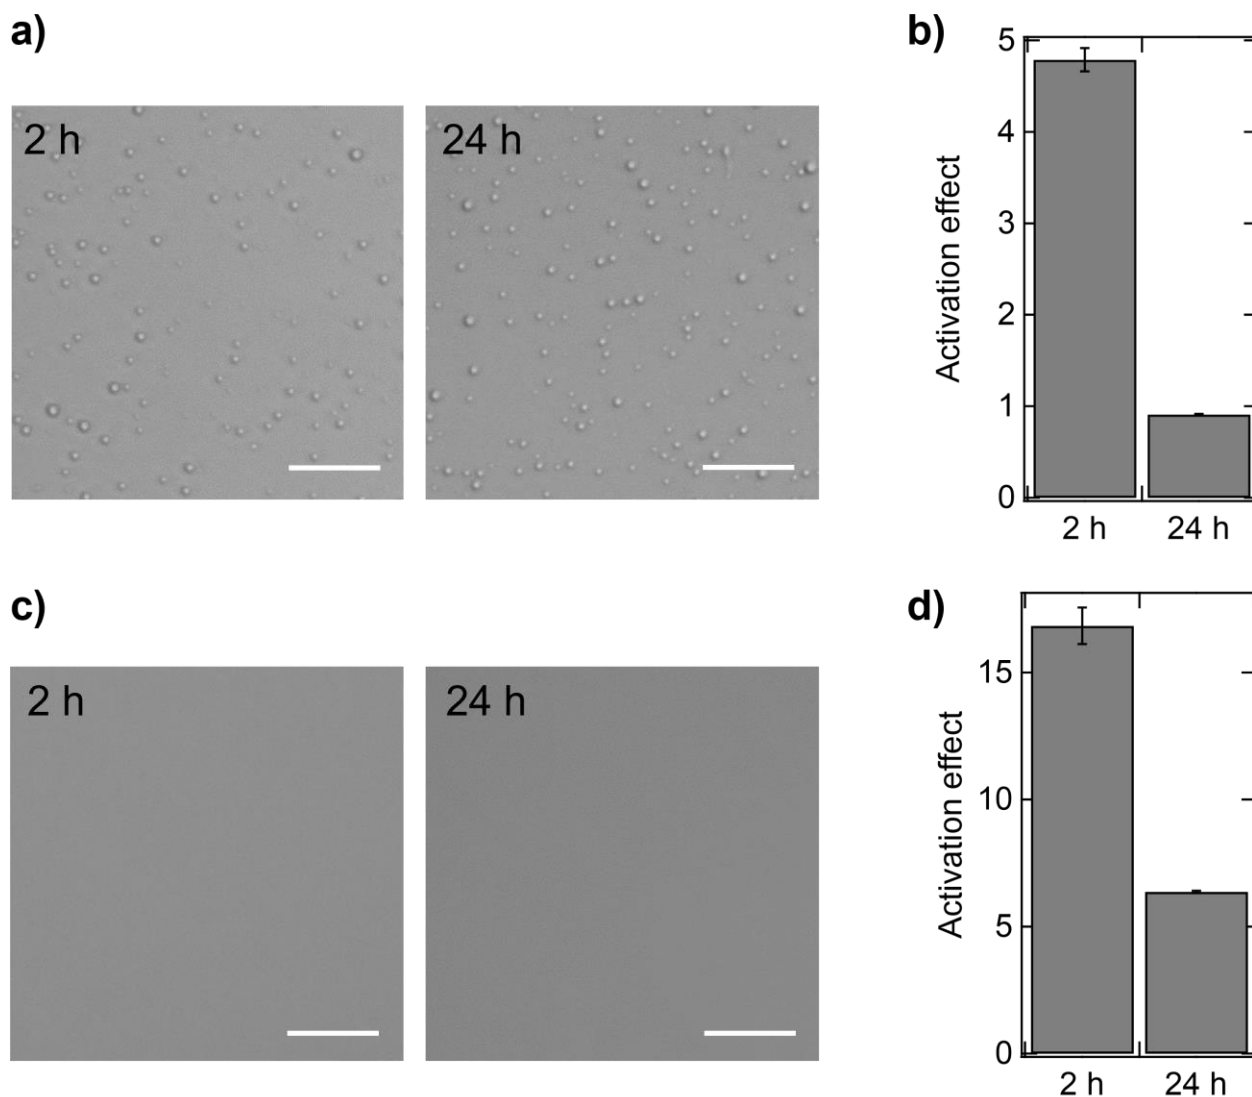

Fig. S8. Stability of droplets and clusters<sub>lox</sub>. **a)** Bright-field field microscopic images of LOX-PLL droplets after 2 h and 24 h. The solution contained 0.1  $\mu\text{M}$  LOX, 0.02 mM PLL, 10 mM  $(\text{NH}_4)_2\text{SO}_4$ , and 20 mM Tris HCl (pH 8). **b)** Activation effect of LOX in the droplets after 2 h and 24 h. The solution contained 0.1  $\mu\text{M}$  LOX, 0.02 mM PLL, 10 mM  $(\text{NH}_4)_2\text{SO}_4$ , 0.1 mM DCIP, 1 mM L-lactic acid, and 20 mM Tris HCl (pH 8). **c)** Bright field microscopic images of cluster<sub>lox</sub> after 2 h and 24 h. The solution contained 0.1  $\mu\text{M}$  LOX, 0.02 mM PLL, and 20 mM Tris HCl (pH 8). **d)** Activation effect of LOX in the cluster<sub>lox</sub> after 2 h and 24 h. The solution contained 0.1  $\mu\text{M}$  LOX, 0.02 mM PLL, 0.1 mM DCIP, 1 mM L-lactic acid, and 20 mM Tris HCl (pH 8). Activation effect was defined as the initial reaction velocity in each condition divided by that in the absence of PLL and  $(\text{NH}_4)_2\text{SO}_4$ .

Supplementary Figure S9

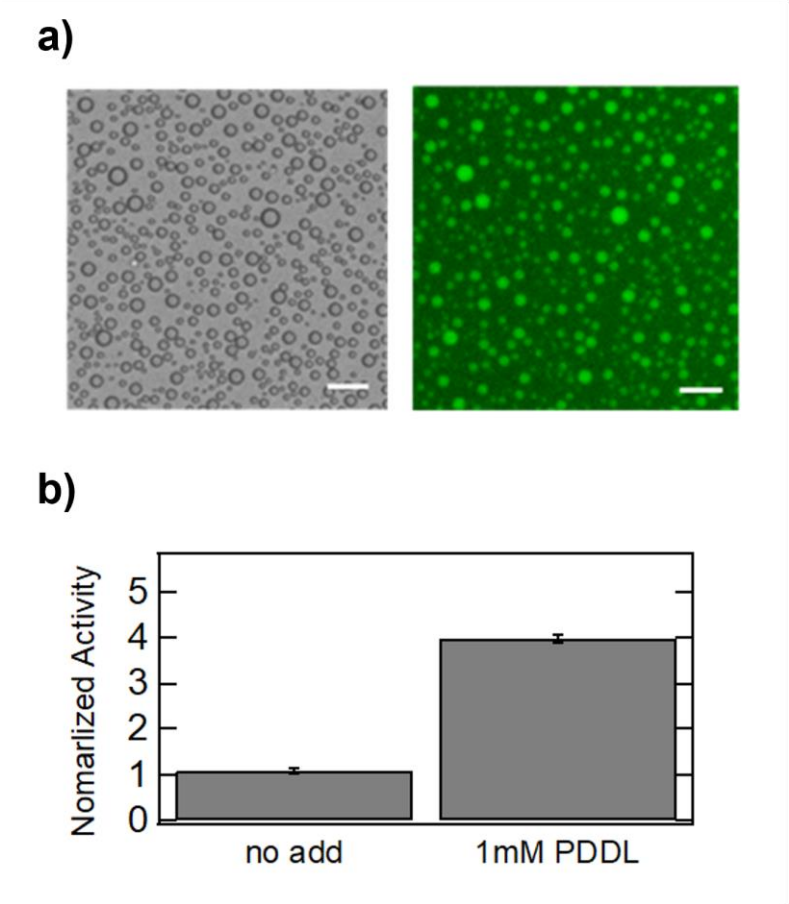

Fig. S9 Formation and activation of LOX-PDDL droplets. **a)** Bright field microscopic images of droplets (left) and fluorescent microscopic images of LOX (right). The solution contained 5  $\mu$ M LOX, 1 mM PDDL, 6 mM  $(\text{NH}_4)_2\text{SO}_4$ , 20 mM Tris HCl, and 20 mM MES (pH 8). Scale bar, 20  $\mu$ m. **b)** Normalized activity of LOX in the presence of 1 mM PDDL.



## Supplementary Figure S10

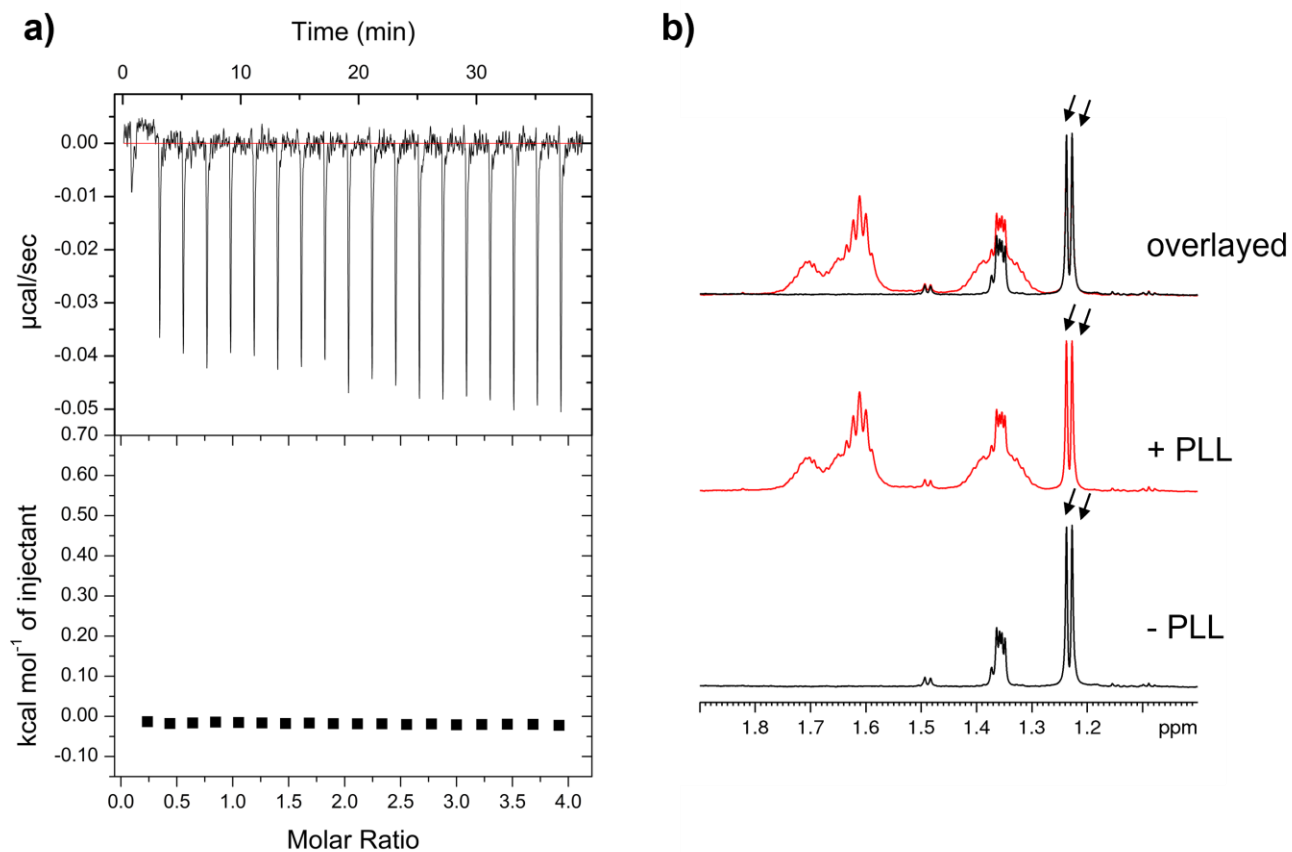

Fig. S10. Interaction of PLL with L-lactate. **a)** ITC analysis to quantify the interaction between PLL and L-lactate. **b)** <sup>1</sup>H-NMR spectra of PLL and L-lactate in the presence and absence of the overlaid PLL.
